# Supplementary material
Source: HighWire-hosted journal article supplement (https://emj.bmj.com/content/39/2/139)
Supplement: inline-supplementary-material-2 [file inline-supplementary-material-2.pdf]

**Protocol data collection**  
Monday – Friday 10:00-19:00

Patient Sticker

- Criteria for inclusion:**
- ✓ Specialism + ED or Fast track » ED
  - ✓ Discharged from ED home
  - ✓ Caretaker present when patient has a cognitive impairment
  - ✓ 70 years of age and above

Signed  
informend  
consent?

No  
Yes

Note reason:.....  
.....  
Patient will NOT be included.  
Put form in map 'Exclusion'.

Put signed form in map 'Inclusion'; go to step 2

Register patient characteristics (var 1 t/m 28) in SPSS database 'pre'/'post'

Inform the nurse and ED doctor that the patient meets the criteria to be included in this study. Research assistant wants to be present at the moment discharge instructions are given. Make notes on the following domains and register in database 'pre' or 'post'.

**Do not forget to hand out the questionnaire to the patient on paper for the telephone follow-up.**

1. Discharge instructions given? Yes  No

2. Instructions given on the following domains;

- a. Diagnosis and treatment;  Notes: .....
- b. Prescribed medication (also the instructions given);  Notes: .....
- c. Post-ED care (wound care, lifestyle advice, etc);  Notes: .....
- d. Follow-up appointments (with GP, etc);  Notes: .....
- e. Return precautions;  Notes: .....

3. Caretaker present? Yes  No

4. Was a discharge letter given to the patient? Yes  No

5. Duration of discharge conversation: ..... minutes

6. Who gave instructions: Resident  Nurse  Physican  Intern   
(multiple answers possible)

7. Appropriate times to call: ..... Phone number: .....

Call the patient 1-3 days after discharge aided by the protocol 'Telephone follow-up'

Register data from protcol 'Telephone-follow-up' in SPSS data base 'zero-measurement.

Finished
